# Supplementary material
Source: PubMed Central journal article supplement (PMC2561338)
Supplement: NIHMS54101-supplement-1.pdf [file NIHMS54101-supplement-1.pdf]

## Supplementary material

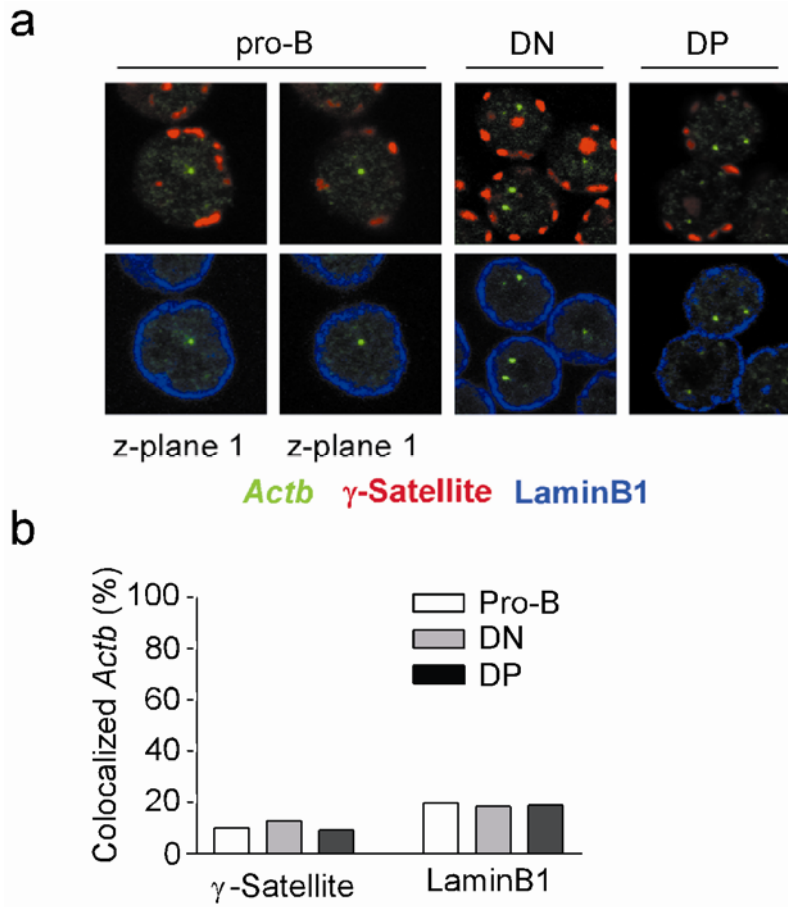

**Supplementary Figure 1** Subnuclear localization of *Actb* alleles in *Rag2*<sup>-/-</sup> pro-B cells, *Rag2*<sup>-/-</sup> DN thymocytes, and sorted wild-type DP thymocytes. (a) 3D Immuno-FISH, showing both *Actb* alleles in representative nuclei of the three cell types. *Actb* (97O1, green), peri-centromeric heterochromatin ( $\gamma$ -satellite, red, upper panels), nuclear lamina (laminB1, blue, lower panels). (b) Colocalization of *Actb* alleles with either  $\gamma$ -satellite repeats or laminB1. Data are from 246 pro-B, 232 DN and 162 pre-B nuclei (one slide each).

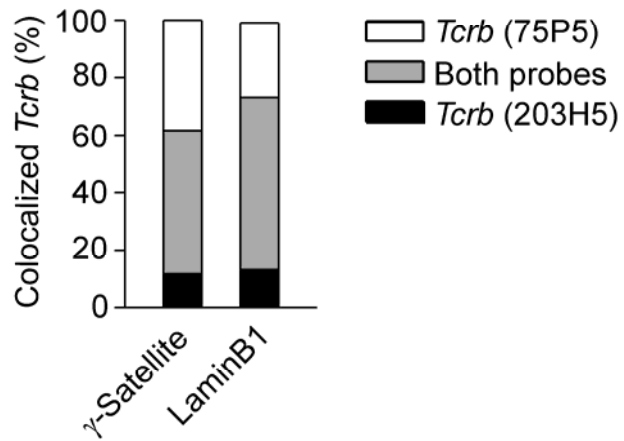

**Supplementary Figure 2** *Tcrb* locus orientation relative to pericentromeric heterochromatin and the nuclear lamina. Colocalization of the distal (75P5) only, proximal (203H5) only or both probes with  $\gamma$ -satellite or laminB1 is indicated.  $\gamma$ -satellite data were from 54 nuclei (one slide); laminB1 data were from 53 nuclei (one slide).

Unsegmented image

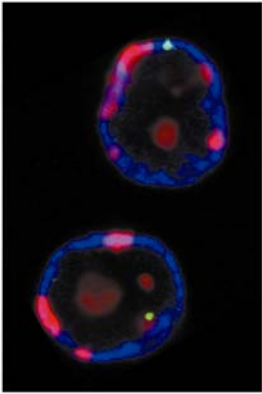

Segmented image

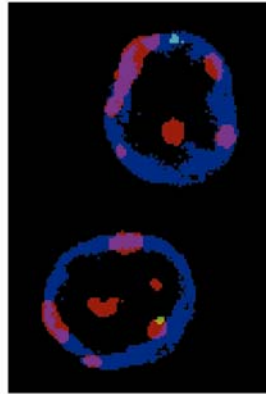

**Supplementary Figure 3** Example of image segmentation performed prior to scoring colocalization of alleles with  $\gamma$ -satellite or lamin B1.

**Supplementary Table 1** Independent segregation of *Tcrb* alleles with laminB1 or  $\gamma$ -satellite in recombinase-sufficient DN thymocytes

|                              |                     |                  |                              | Experimental distribution of nuclei (%) |            |              | Theoretical distribution of nuclei (%) |            |              |
|------------------------------|---------------------|------------------|------------------------------|-----------------------------------------|------------|--------------|----------------------------------------|------------|--------------|
| Cell Type                    | Nuclear compartment | Number of nuclei | Allelic association rate (%) | Neither allele                          | One allele | Both alleles | Neither allele                         | One allele | Both alleles |
|                              |                     |                  | p                            |                                         |            |              | $(1-p)^2$                              | $2p(1-p)$  | $p^2$        |
| <i>Lat</i> <sup>-/-</sup> DN | laminB1             | 299              | 69.2                         | 10.0                                    | 41.5       | 48.5         | 9.5                                    | 42.6       | 47.9         |
|                              | $\gamma$ -satellite | 71               | 37.3                         | 38.0                                    | 49.3       | 12.7         | 39.3                                   | 46.8       | 13.9         |

**Supplementary Table 2** Independent segregation of *Actb* alleles with laminB1 or  $\gamma$ -satellite

|                     |           |                  |                              | Experimental distribution of nuclei (%) |            |              | Theoretical distribution of nuclei (%) |            |              |
|---------------------|-----------|------------------|------------------------------|-----------------------------------------|------------|--------------|----------------------------------------|------------|--------------|
| Nuclear compartment | Cell type | Number of nuclei | Allelic association rate (%) | Neither allele                          | One allele | Both alleles | Neither allele                         | One allele | Both alleles |
|                     |           |                  | p                            |                                         |            |              | $(1-p)^2$                              | $2p(1-p)$  | $p^2$        |
| laminB1             | pro-B     | 123              | 19.9                         | 65.0                                    | 30.1       | 4.9          | 64.1                                   | 31.9       | 4.0          |
|                     | DN        | 116              | 18.5                         | 65.5                                    | 31.9       | 2.6          | 66.4                                   | 30.2       | 3.4          |
|                     | DP        | 81               | 19.1                         | 71.6                                    | 18.5       | 9.9          | 65.4                                   | 30.9       | 3.7          |
| $\gamma$ -satellite | pro-B     | 123              | 10.2                         | 80.5                                    | 18.7       | 0.8          | 80.7                                   | 18.3       | 1.0          |
|                     | DN        | 116              | 12.9                         | 78.4                                    | 17.2       | 4.3          | 75.8                                   | 22.5       | 1.7          |
|                     | DP        | 81               | 9.3                          | 85.2                                    | 11.1       | 3.7          | 82.3                                   | 16.8       | 0.9          |

**Supplementary Table 3** Independent segregation of *Tcra* alleles with laminB1 or  $\gamma$ -satellite

|                     |           |                  |                              | Experimental distribution of nuclei (%) |            |              | Theoretical distribution of nuclei (%) |            |              |
|---------------------|-----------|------------------|------------------------------|-----------------------------------------|------------|--------------|----------------------------------------|------------|--------------|
| Nuclear compartment | Cell type | Number of nuclei | Allelic association rate (%) | Neither allele                          | One allele | Both alleles | Neither allele                         | One allele | Both alleles |
|                     |           |                  | p                            |                                         |            |              | $(1-p)^2$                              | $2p(1-p)$  | $p^2$        |
| laminB1             | pro-B     | 151              | 64.6                         | 13.2                                    | 44.4       | 42.4         | 12.6                                   | 45.8       | 41.7         |
|                     | DN        | 26               | 19.2                         | 73.1                                    | 15.4       | 11.5         | 65.2                                   | 31.1       | 3.7          |
|                     | DP        | 89               | 28.1                         | 53.9                                    | 36.0       | 10.1         | 51.7                                   | 40.4       | 7.9          |
| $\gamma$ -satellite | pro-B     | 151              | 31.5                         | 49.0                                    | 39.1       | 11.9         | 47.0                                   | 43.1       | 9.9          |
|                     | DN        | 26               | 9.6                          | 84.6                                    | 11.5       | 3.8          | 81.7                                   | 17.4       | 0.9          |
|                     | DP        | 89               | 11.8                         | 82.0                                    | 12.4       | 5.6          | 77.8                                   | 20.8       | 1.4          |
